# Supplementary material for: Machine learning in electron beam lithography to boost photoresist formulation design for high-resolution patterning
Source: Royal Society of Chemistry journal article supplement (doi:10.1039/d3nr04819e), 2024-01-01
Supplement: d3nr04819e1.pdf [file d3nr04819e1.pdf]

## Supplementary Information

### **Machine learning in electron beam lithography to boost photoresist formulation design for high-resolution patterning**

Rongbo Zhao,<sup>a</sup> Xiaolin Wang,<sup>a</sup> Hong Xu,<sup>\*a</sup> Yayi Wei,<sup>bc</sup> and Xiangming He<sup>\*a</sup>

<sup>a</sup>Institute of Nuclear and New Energy Technology, Tsinghua University, Beijing 100084, China

<sup>b</sup>Institute of Microelectronics of Chinese Academy of Sciences, Beijing 100029, China

<sup>c</sup>University of Chinese Academy of Sciences, Beijing 100049, China

E-mail: hongxu@tsinghua.edu.cn; hexm@tsinghua.edu.cn

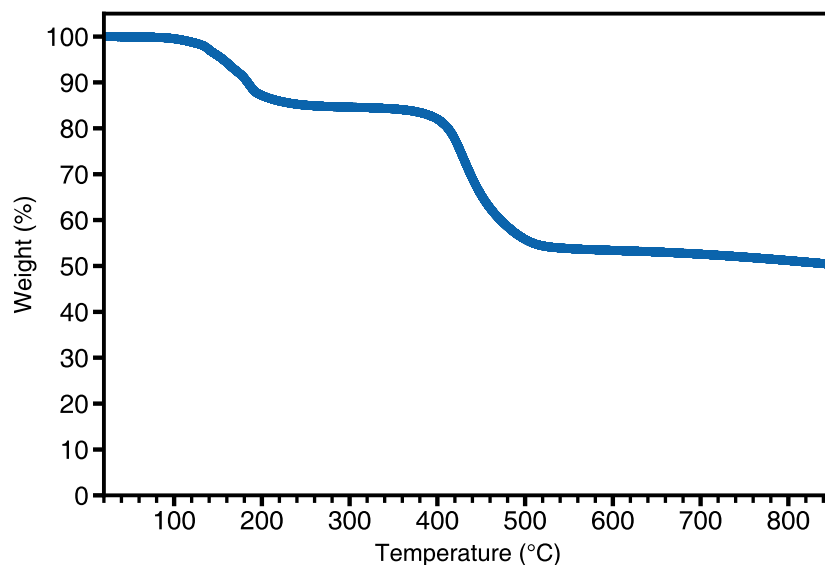

**Fig. S1** Thermogravimetric analysis (TGA) curve of the prepared photoresist composition  $Zr_6O_4(OH)_4(MAA)_{12}$  under a nitrogen atmosphere. The TGA of  $Zr_6O_4(OH)_4(MAA)_{12}$  cluster was performed on a TA instrument, Q5000IR. The thermal decomposition temperature was determined by heating from 22 °C to 850 °C at a rate of 10 °C min<sup>-1</sup>.

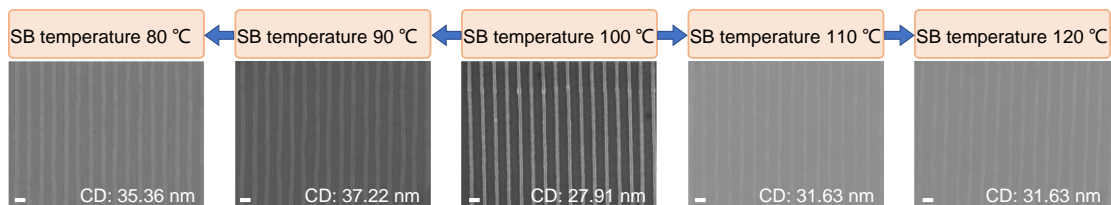

**Fig. S2** Determination of appropriate soft bake (SB) temperature. In the SB process, five temperatures of 80 °C, 90 °C, 100 °C, 110 °C and 120 °C were selected, and the line layout was used for electron beam exposure. The photoresist CDs were used as the evaluation indicators, and their values were measured and compared. The suitable SB temperature was determined to be 100 °C. Scale bars denote 100 nm.
